# Supplementary material
Source: PubMed Central journal article supplement (PMC9761687)

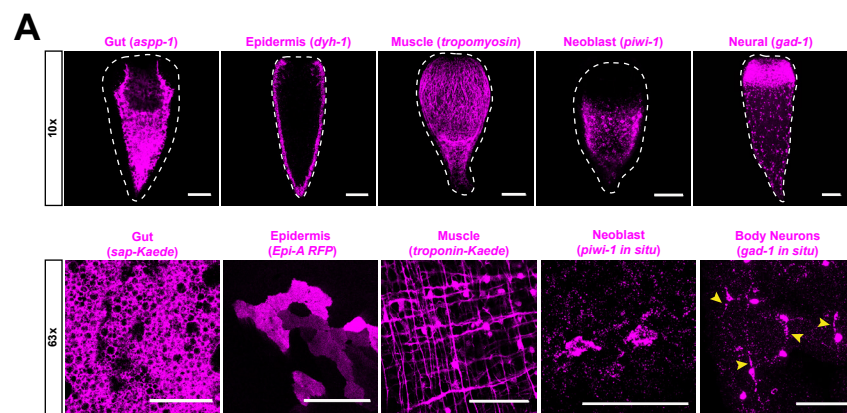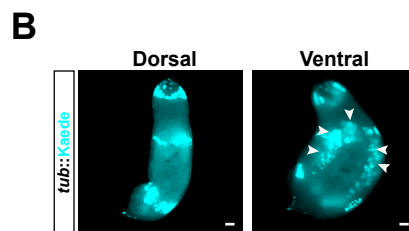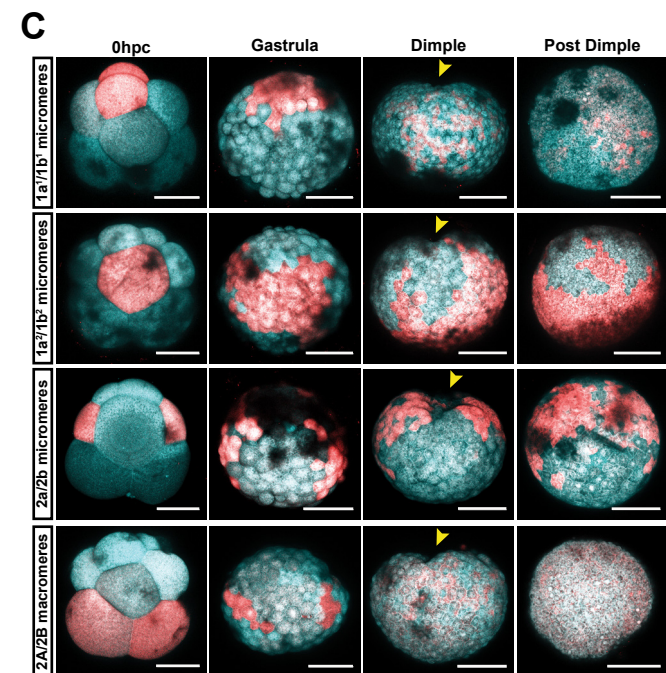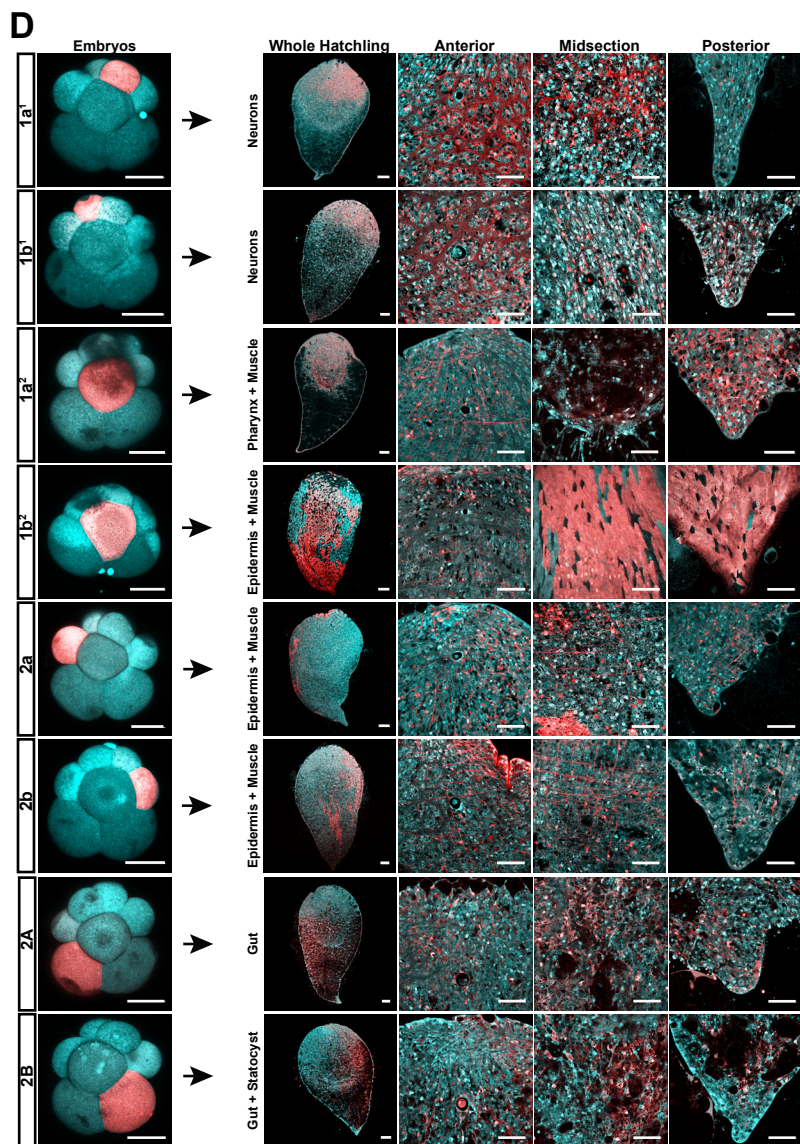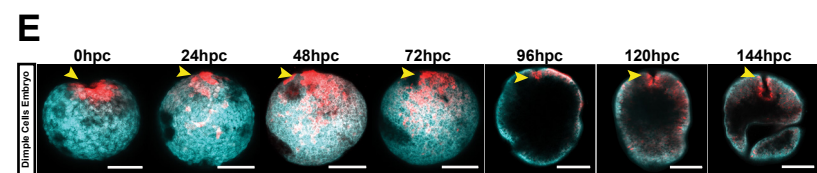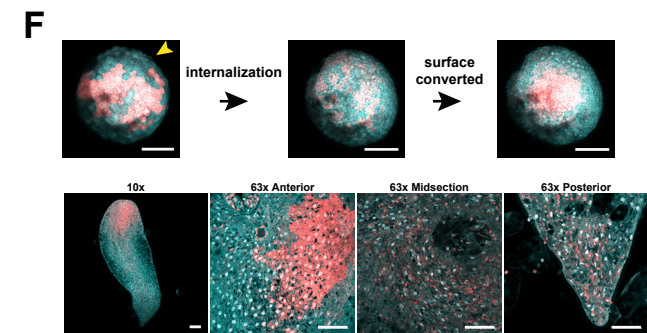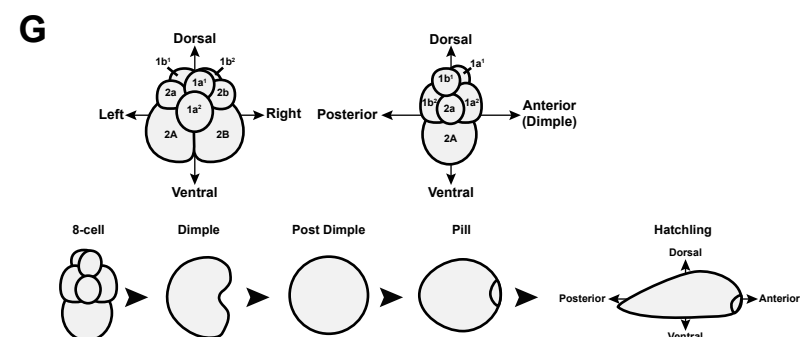

Supplement: NIHMS1854506-supplement-1.pdf [file NIHMS1854506-supplement-1.pdf]

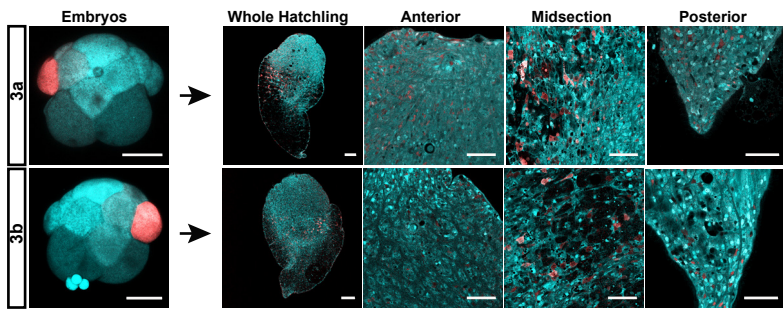

Supplement: NIHMS1854506-supplement-2.pdf [file NIHMS1854506-supplement-2.pdf]

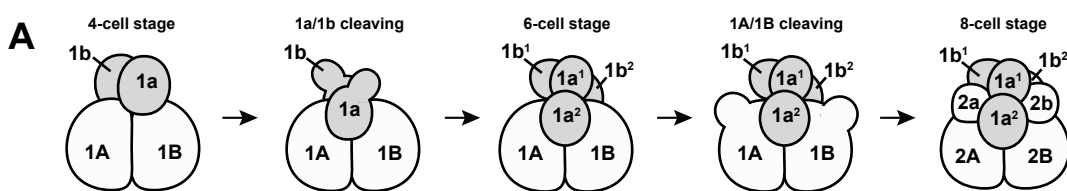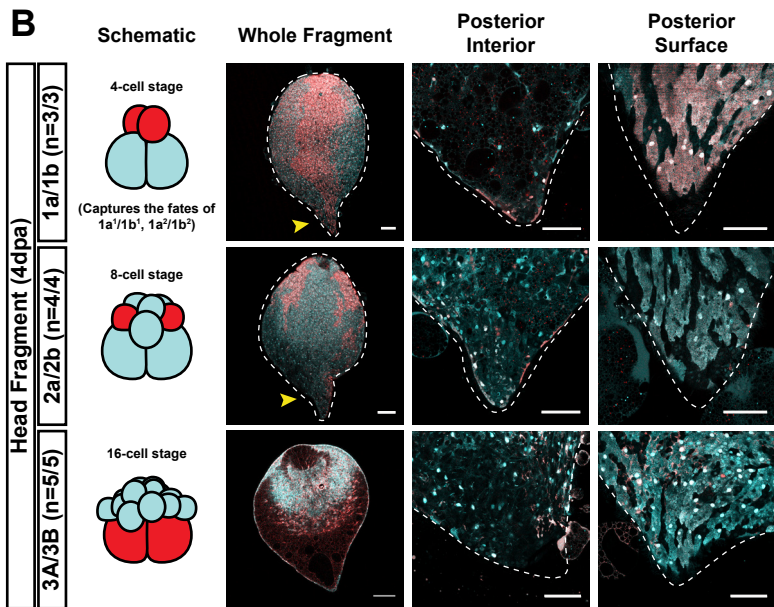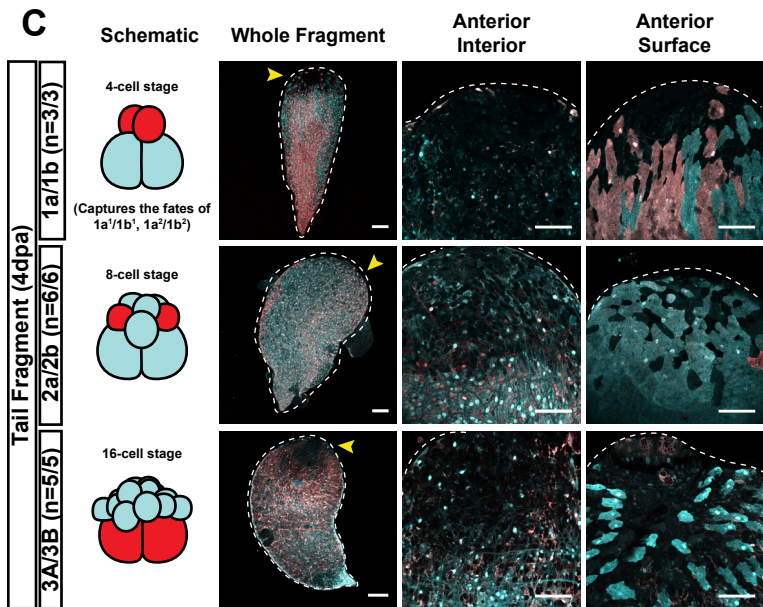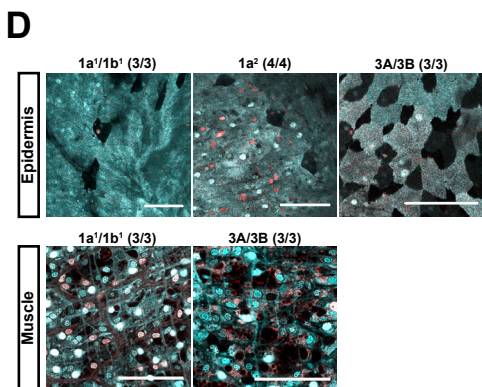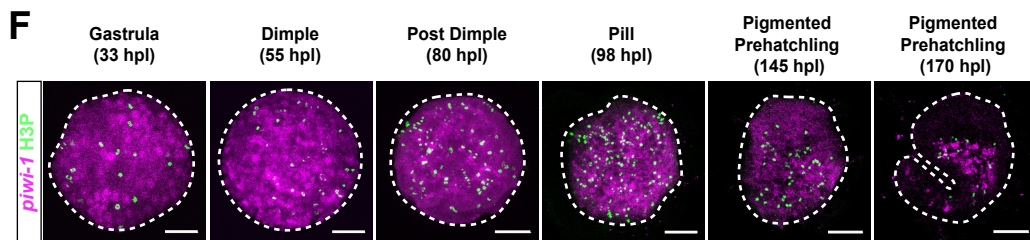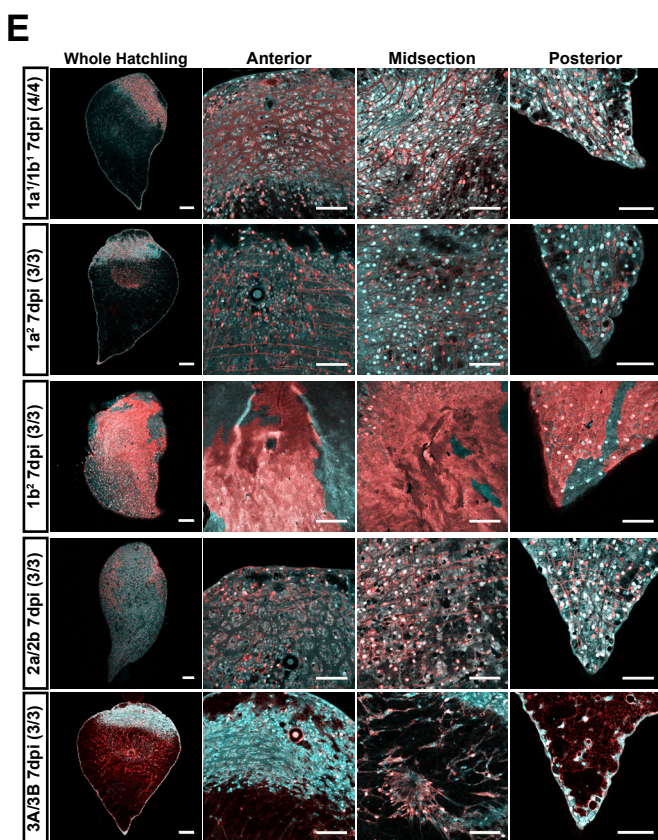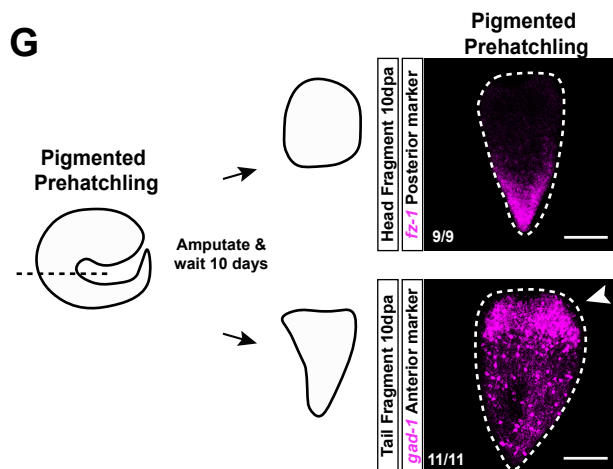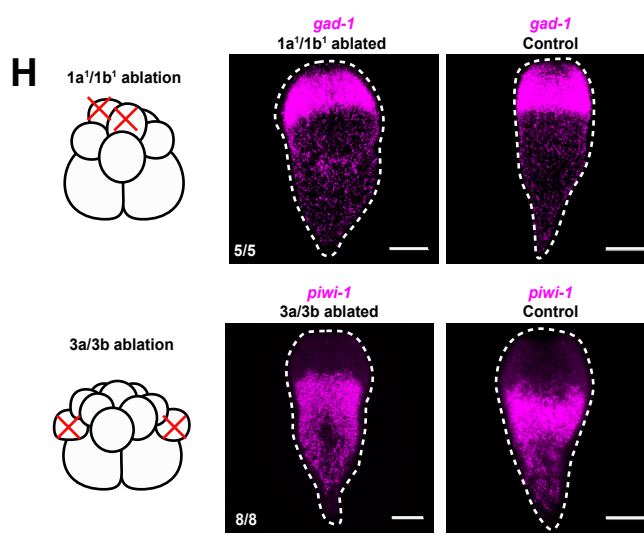

Supplement: NIHMS1854506-supplement-3.pdf [file NIHMS1854506-supplement-3.pdf]

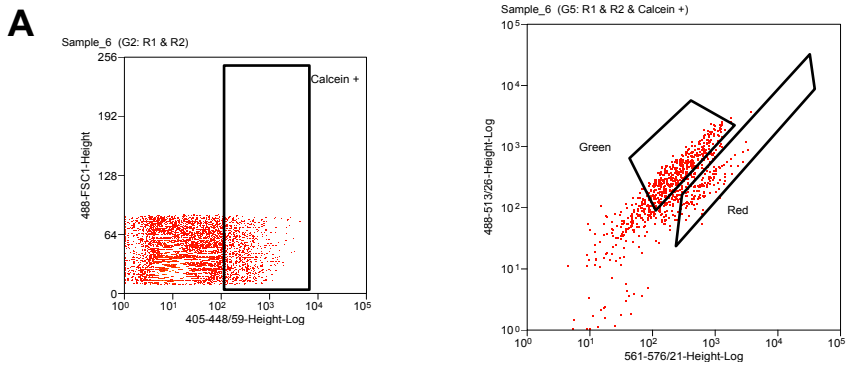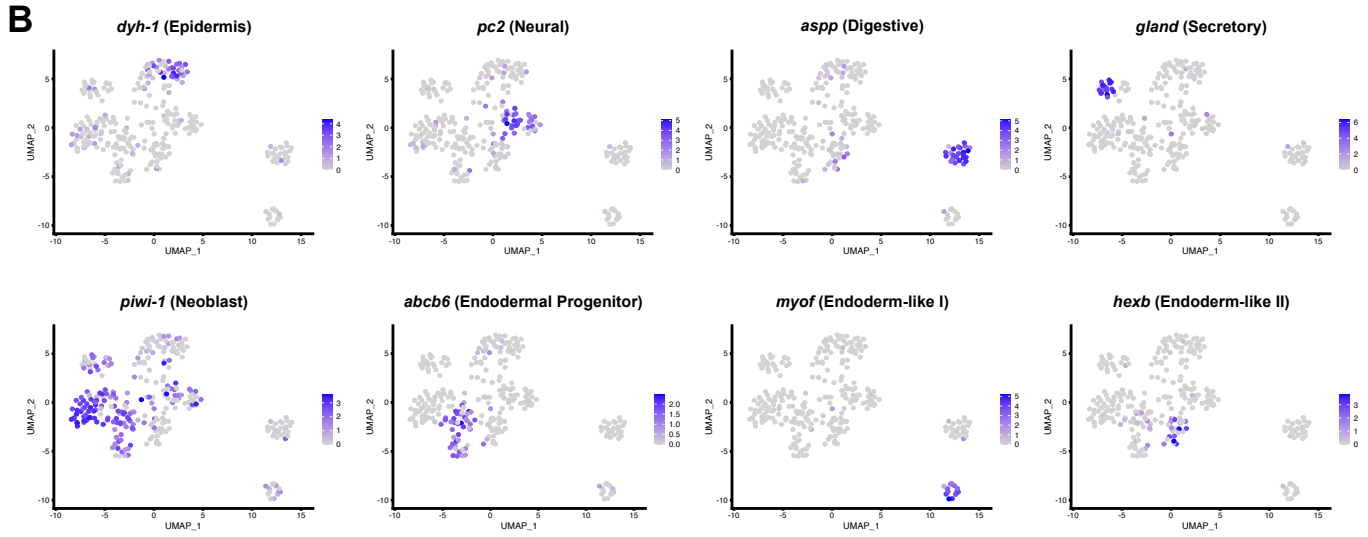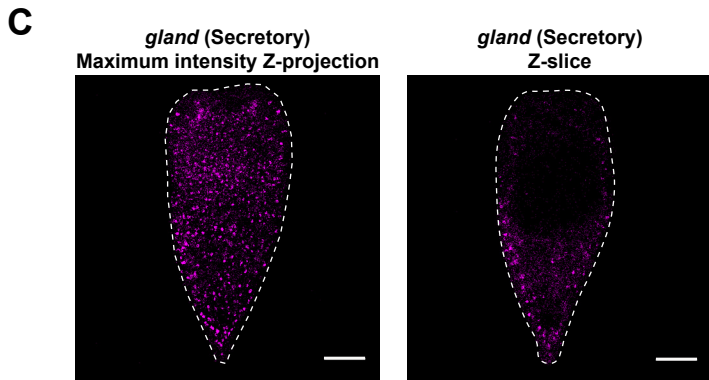

Supplement: NIHMS1854506-supplement-4.pdf [file NIHMS1854506-supplement-4.pdf]

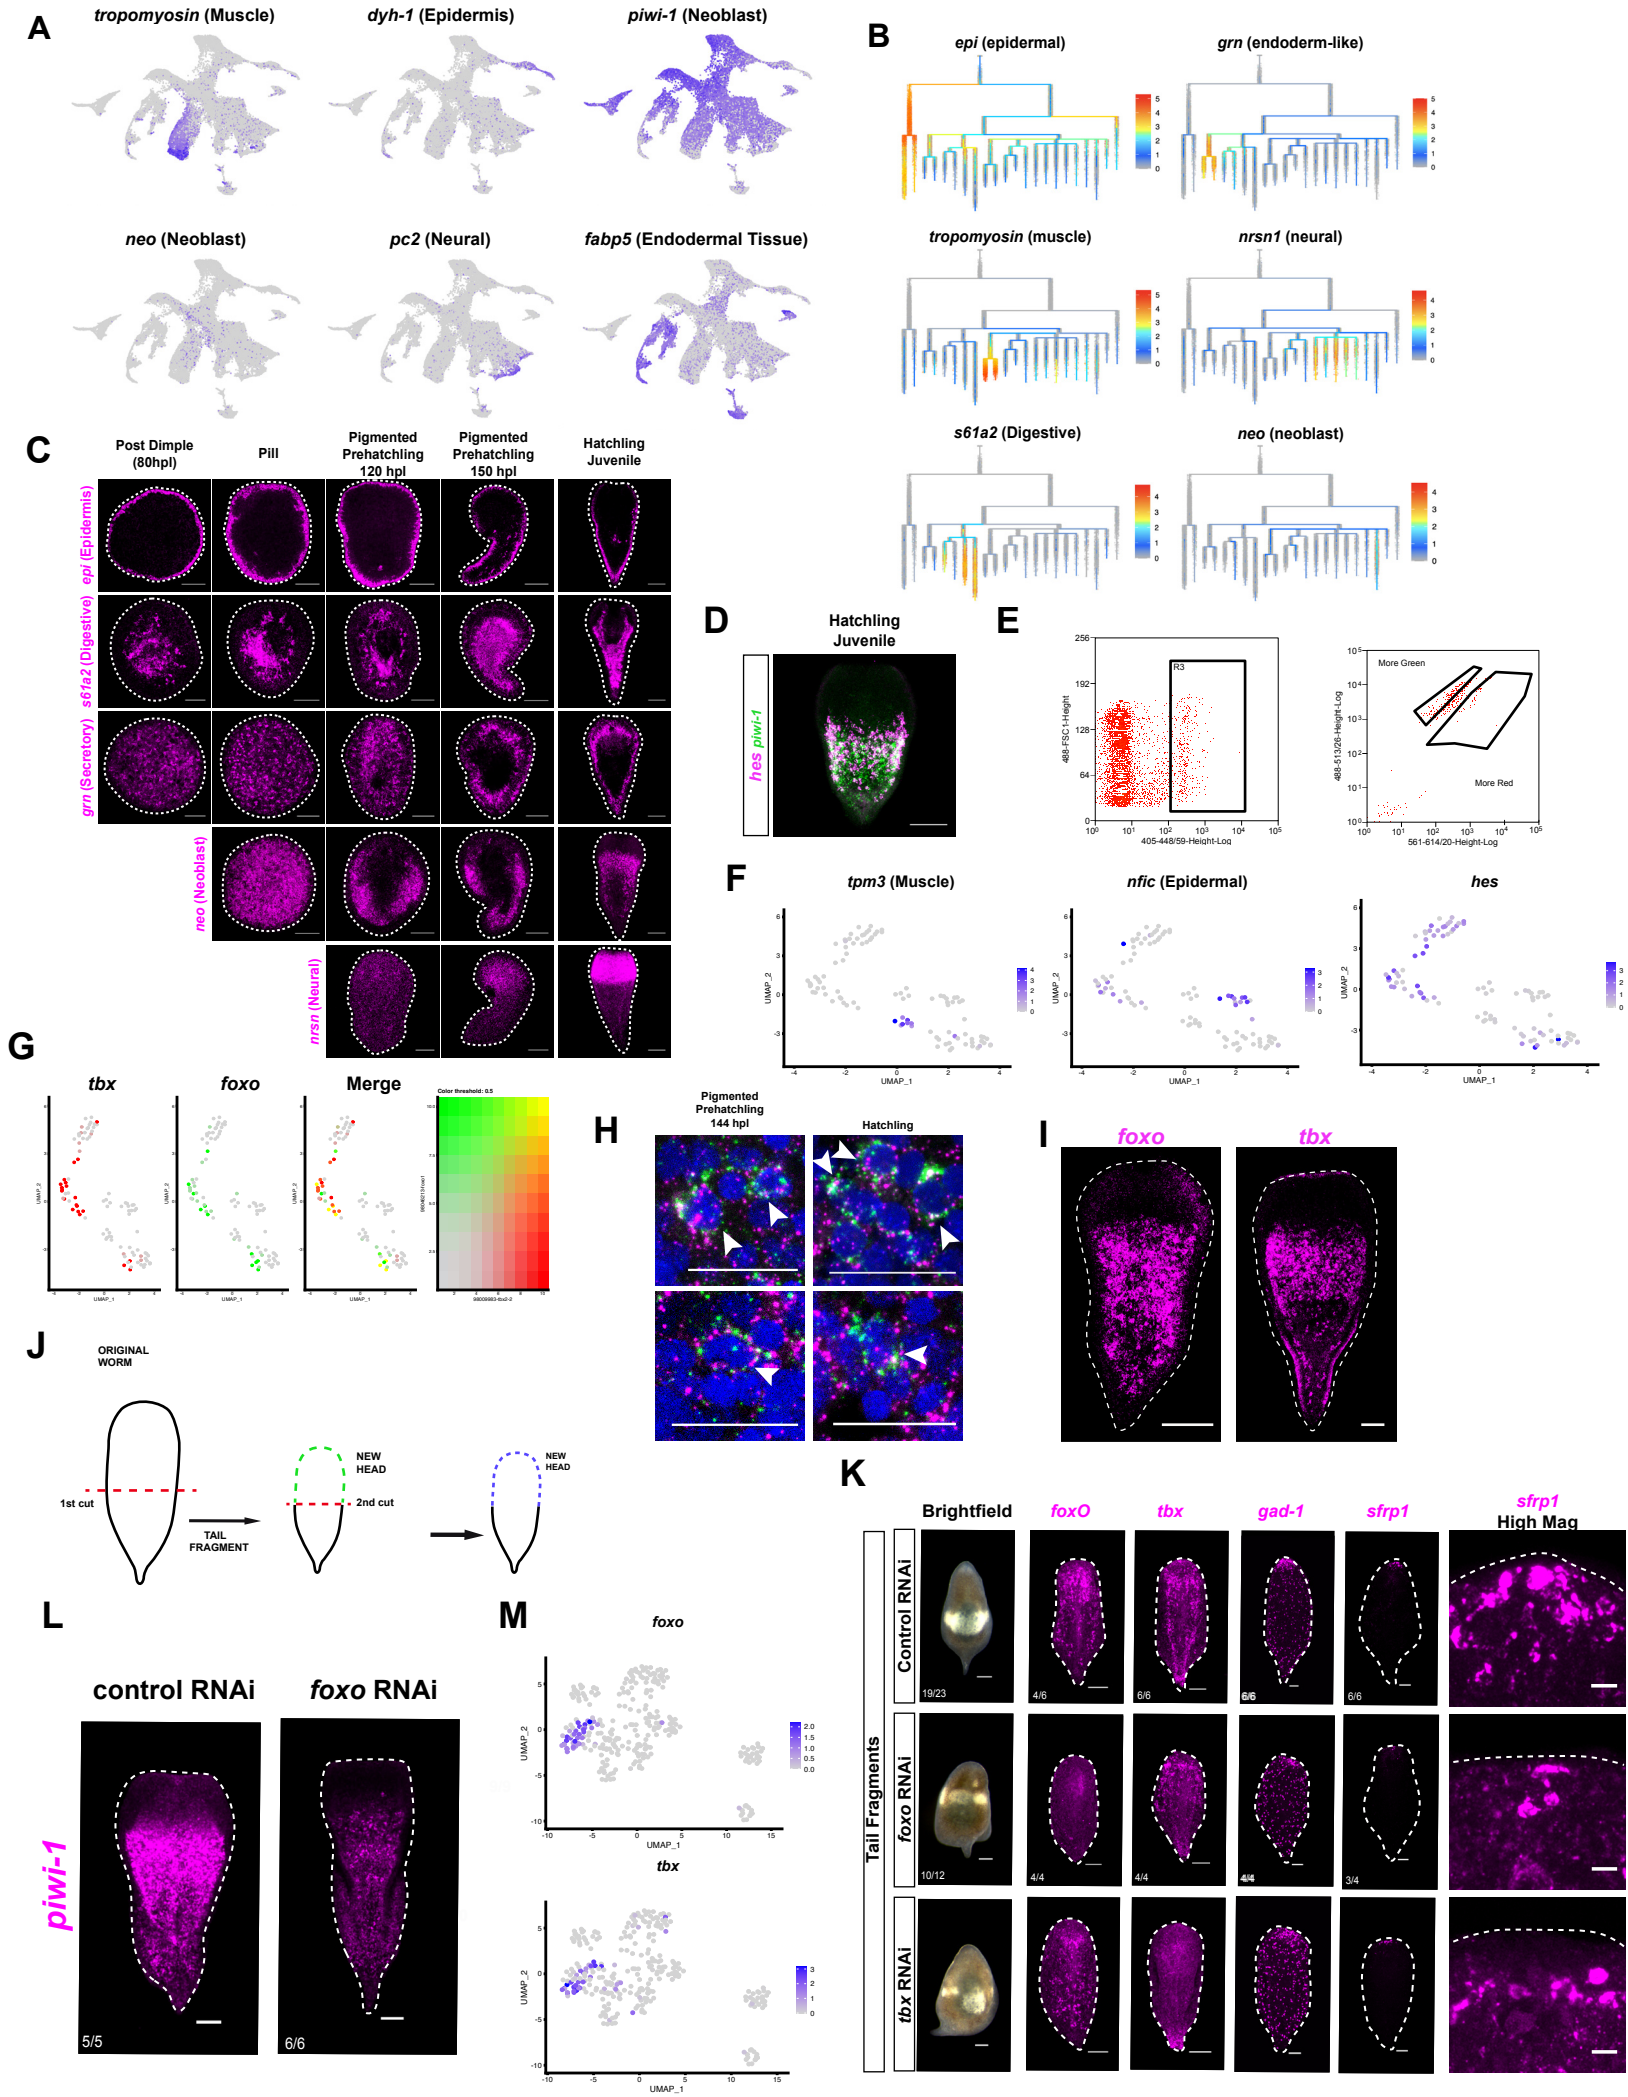

Supplement: NIHMS1854506-supplement-5.pdf [file NIHMS1854506-supplement-5.pdf]
